# Supplementary material for: Crosstalk between G-Quadruplexes and Dnmt3a-Mediated Methylation of the c-MYC Oncogene Promoter
Source: MDPI journal article supplement (doi:10.3390/ijms25010045), 2023-12-19
Supplement: s1 [file s1]

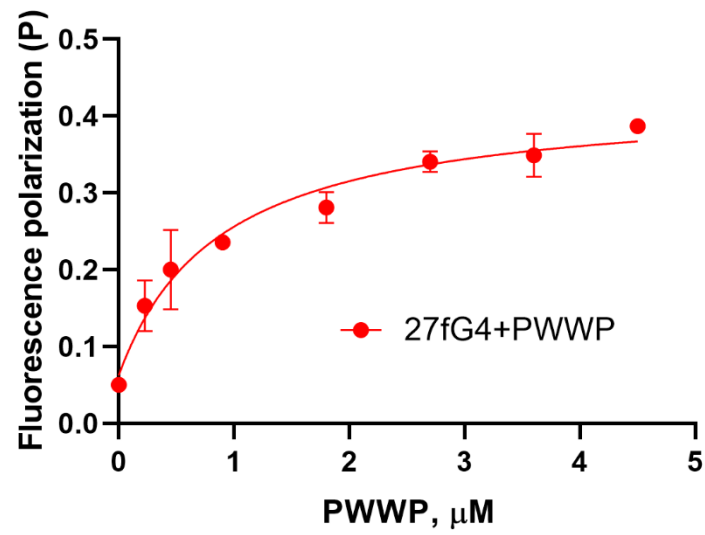

**Figure S1.** Binding curve of FAM-labeled 27fG4 to Dnmt3a PWWP domain derived from fluorescence polarization data. 60 nM 27fG4, 100  $\mu\text{M}$  S-adenosyl-L-homocysteine, 20 mM HEPES-NaOH (pH 7.5), 100 mM KCl, 1 mM EDTA, 1 mM 1,4-dithiothreitol, 0 – 4.5  $\mu\text{M}$  PWWP.
